# Supplementary material for: Topological Dirac states in transition-metal monolayers on graphyne
Source: Royal Society of Chemistry journal article supplement (doi:10.1039/c9cp01153f), 2019-01-01
Supplement: c9cp01153f1.pdf [file c9cp01153f1.pdf]

# Supplementary information for

## Topological Dirac states in transition-metal monolayer on graphyne

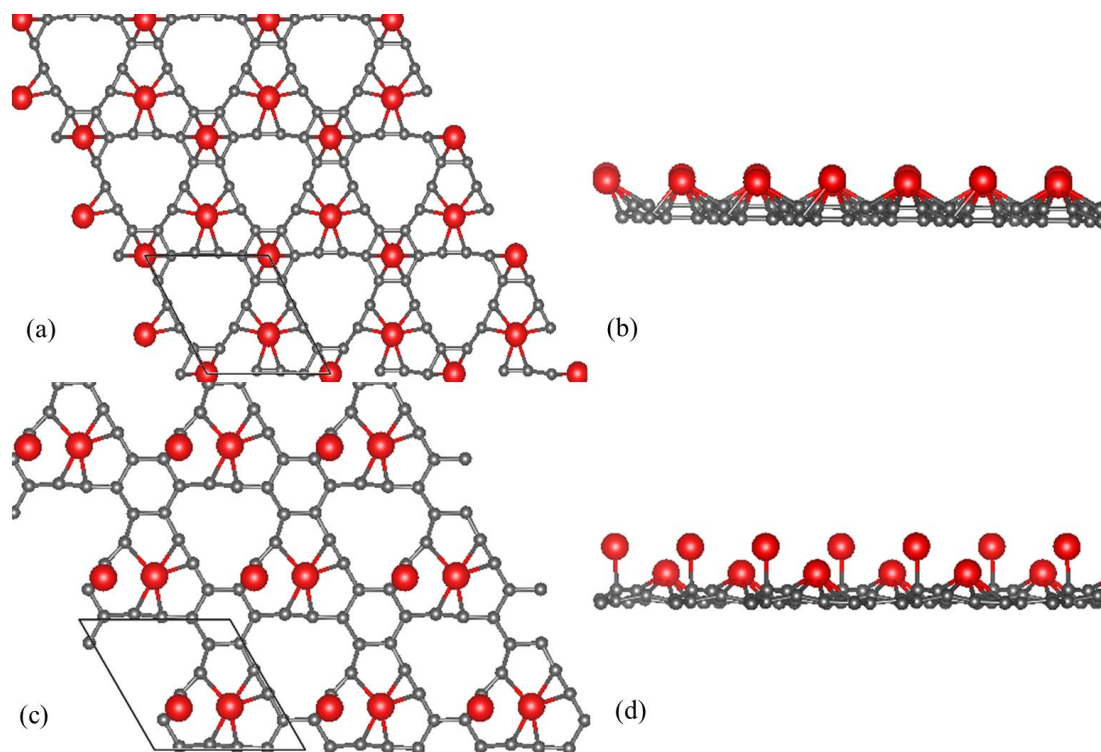

Figure S1. Top view (a, c) and side view (b, d) for H1-H2 and H1-B1 configuration. The red and gray balls, denote Hf and C atom, respectively. The black lines in (a, c) outline the primitive cell.

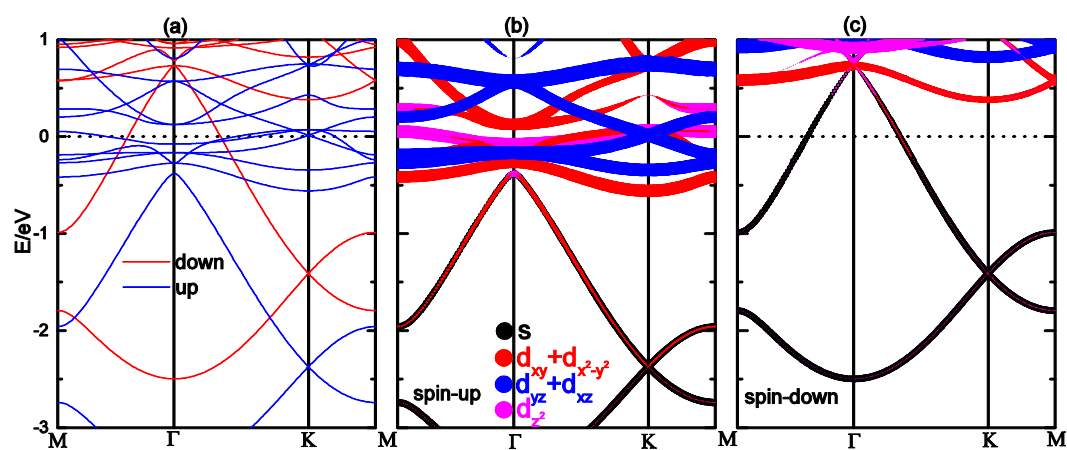

Figure S2. Calculated band structures (a) and orbital projected band structures of spin-up states (b) and spin-down (c) of the isolated Hf-monolayer detached from graphyne. Red lines and blue lines represent the spin-down and spin-up states, respectively.

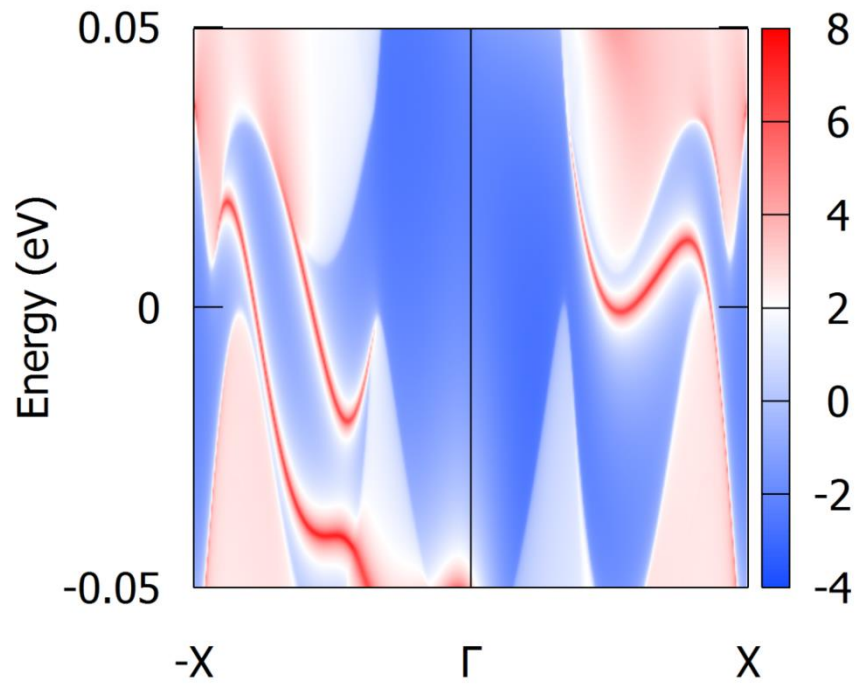

Figure S3. Calculated topological edge states of Hf-graphyne.
